# Supplementary material
Source: PubMed Central journal article supplement (PMC4016088)
Supplement: supp_131727_pulse-siev-1-at.pdf [file supp_131727_pulse-siev-1-at.pdf]

**Appendix 1 (as provided by the authors): Search strategy for studies assessing the effect of intake of dietary pulses (beans, chickpeas, lentils and peas) on lipids in randomized controlled trials\***

| DATABASE                  | SEARCH PERIOD                  | SEARCH                                                                                                                                                                                                                                                                                                                                                                                                                                                |
|---------------------------|--------------------------------|-------------------------------------------------------------------------------------------------------------------------------------------------------------------------------------------------------------------------------------------------------------------------------------------------------------------------------------------------------------------------------------------------------------------------------------------------------|
| MEDLINE                   | 1948 to week 5 of January 2014 | <ol style="list-style-type: none"> <li>(Fabaceae or lentil\$ or chickpea\$ or bean\$ or pea\$ or legume\$ or leguminous) and (lipid\$ or cholesterol\$ or apolipoprotein B or hyperlipidemia or lipaemia). mp</li> <li>Limit to animals</li> <li>1 not 2</li> <li>Limit to Clinical Trials, Clinical Trial, ALL</li> <li>Limit to Clinical Trial</li> <li>Limit to Controlled Clinical Trial</li> <li>Limit to Randomized Controlled Trial</li> </ol> |
| EMBASE Classic and EMBASE | 1947 to Week 5 of 2014         | <ol style="list-style-type: none"> <li>(Fabaceae OR lentil\$ OR chickpea\$ OR bean\$ OR pea\$ OR legume\$ OR leguminous) AND (lipid\$ OR cholesterol\$ OR apolipoprotein B OR hyperlipidemia OR lipaemia). mp</li> <li>Limit to Animals and Animal Studies</li> <li>1 not 2</li> <li>Limit to Clinical Trial</li> <li>Limit to Randomized Controlled Trial</li> <li>Limit to Controlled Clinical Trial</li> </ol>                                     |
| The Cochrane Library      | 1991 to February 5 2014        | <ol style="list-style-type: none"> <li>(Fabaceae OR lentil\$ OR chickpea\$ OR bean\$ OR pea\$ OR legume\$ OR leguminous) AND (lipid\$ OR cholesterol\$ OR apolipoprotein B OR hyperlipidemia OR lipaemia). mp</li> </ol>                                                                                                                                                                                                                              |
| CINAHL                    | 1982 to February 5 2014        | <ol style="list-style-type: none"> <li>(lentil\$ OR chickpea\$ OR bean\$ OR pea\$ OR legume\$ OR leguminous) AND (lipid\$ OR VLDL OR apolipoprotein B OR hyperlipidemia OR lipaemia)</li> </ol>                                                                                                                                                                                                                                                       |

\*The original search was conducted on May 9, 2011, for MEDLINE, Embase and CINAHL, and on June 13, 2011, for the Cochrane Library. Updated searches of all databases were performed on Dec. 2, 2011; on Apr. 9, Oct. 2 and 29, and Nov. 13, 2012; on Feb. 13, 2013; and on Feb. 5, 2014.
