# Supplementary material
Source: PubMed Central journal article supplement (PMC4016088)
Supplement: supp_131727_pulse-siev-2-at.pdf [file supp_131727_pulse-siev-2-at.pdf]

## Appendix 2 (as supplied by authors): Study characteristics

| STUDY*                           | PARTICIPANTS†         | AGE (SD or Range), yr          | BASELINE (SD)‡                                                                       | CHD-RISK SCORE§ | LIPID MEDICATION USE | DESIGN¶ | SETTING**           | FEEDING CONTROL†† | ENERGY BALANCE‡‡  | PULSE DOSE (grams/day)§§ |
|----------------------------------|-----------------------|--------------------------------|--------------------------------------------------------------------------------------|-----------------|----------------------|---------|---------------------|-------------------|-------------------|--------------------------|
| Abete et al. 2009 [1]            | 18 Ob (18M:0W)        | ~37.1±8.0                      | 3.01 (0.75), 4.33(0.72)<br>-                                                         | 2<br>-          | No                   | P       | OP Spain            | Non-Metab         | Negative (-30% E) | ~90                      |
| Abeysekara et al. 2012 [2] §§§   | 87 (30M:57W)          | 59.7±6.3                       | ~3.53, ~4.91<br>2.96 (0.86), 2.93 (0.84)<br>-                                        | 3<br>3          | No                   | C       | OP Canada           | Partial           | Neutral           | 250                      |
| Anderson et al. 1984 [3]         | 20 HC (20M:0W)        | ~54±8.4                        | 4.92 (0.31), 5.72 (0.36)<br>-                                                        | 5<br>-          | No                   | P       | IP United States    | Metab             | Neutral           | 101                      |
| Anderson et al. 1990- I [4]      | 6 HC (6M:0W)          | 64±2.4                         | ~6.50, ~7.04<br>-                                                                    | 4<br>-          | No                   | P       | OP United States    | Partial           | Neutral           | ~113                     |
| Anderson et al. 1990- II [4]     | 9 HC (9M:0W)          | 57±9                           | -                                                                                    | 4               | No                   | P       | OP United States    | Partial           | Neutral           | ~113                     |
| Anderson et al. 1990- III [4]    | 9 HC (9M:0W)          | 54 ± 9                         | -                                                                                    | 4               | No                   | P       | OP United States    | Partial           | Neutral           | ~152                     |
| Belski et al. 2011 [5] §§§       | 93 OW/Ob (52M:41W)    | ~46.6±10                       | 3.33 (0.76), 3.29 (0.77)<br>-                                                        | 4<br>3          | No                   | P       | OP Australia        | Partial           | Negative (-35% E) | 50                       |
| Cobiac et al. 1990 [6]           | 20 HC (20M:0W)        | 29-65                          | ~3.99, ~3.85<br>4.69 (0.67)<br>-                                                     | 4<br>-          | No                   | C       | OP Australia        | Partial           | Neutral           | ~377                     |
| Duane et al. 1997 [7]            | 9 N (9M:0W)           | 58 (41-78)                     | ~5.13<br>3.58 (0.83), 3.23 (0.66)<br>-                                               | 5<br>-          | -                    | C       | IP United States    | Metab             | Neutral           | ~251                     |
| Finley et al. 2007- N [8]        | 40 N (20M:20W)        | ~37.4±11                       | 4.45 (0.63), 4.24 (0.62)<br>-                                                        | 3<br>2          | No                   | P       | OP United States    | Partial           | Neutral           | 130                      |
| Finley et al. 2007-Pre-MS [8]    | 40 Pre-MS (20M:20W)   | ~42.4±10                       | -                                                                                    | 3<br>2          | No                   | P       | OP United States    | Partial           | Neutral           | 130                      |
| Gormley et al. 1979 [9]          | 53 N                  | majority of participants 30-50 | ~3.66, ~3.66<br>-                                                                    | 3<br>3          | -                    | P       | OP Ireland          | Partial           | Neutral           | ~59                      |
| Gravel et al. 2010 [10] §§§      | 114 Pre-MS (0M:114W)  | ~51.2±8.6                      | ~5.50, ~5.49<br>3.82 (0.87), 3.91 (0.83)<br>1.09 (0.23), 1.11 (0.23)<br>~4.40, ~4.45 | -<br>2          | No                   | P       | OP Canada           | Partial           | Neutral           | ~81                      |
| Hermisdorff et al. 2011 [11]     | 30 Ob (17M:13W)       | 36 ± 8                         | 3.32 (0.60), 3.68 (1.06)<br>-                                                        | 3<br>3          | No                   | P       | OP Spain            | Non-Metab         | Negative (-30% E) | ~198                     |
| Hodgeson et al. 2010 [12]        | 74 OW/Ob (26M:48W)    | ~57.9±7.9                      | 3.18, 4.30<br>3.25 (0.91), 3.34 (0.92)<br>-                                          | 3<br>2          | Yes                  | P       | OP Australia        | Partial           | Neutral           | ~64                      |
| Jenkins et al. 2012 [13]         | 121 T2D (61M:60W)     | ~59.5±12.8                     | ~3.85, ~3.96<br>2.36 (1.01), 2.18 (0.75)<br>-                                        | CHD Risk Equiv  | Yes                  | P       | OP Canada           | Non-Metab         | Neutral           | 196                      |
| Jimenez-Cruz et al. 2004 [14]    | 8 T2D                 | 51±3                           | 3.00 (1.03), 2.95 (0.96)<br>4.27 (0.70), 5.02 (0.06)<br>-                            | CHD Risk Equiv  | No                   | C       | OP USA              | Non-Metab         | Neutral           | -                        |
| Mackay et al. 1992 [15]          | 39 HC (22M:17W)       | ~47 (28-66)                    | ~4.98, ~5.53<br>4.19 (0.84)<br>-                                                     | 4<br>4          | -                    | C       | OP New Zealand      | Partial           | Neutral           | 80                       |
| Marinangeli et al. 2011 [16] §§§ | 23 OW/Ob, HC (7M:16W) | ~52.0±10.6                     | ~5.13<br>3.81 (0.62), 3.78 (0.62)<br>-                                               | 3<br>2          | No                   | C       | OP Canada           | Metab             | Neutral           | ~138                     |
| Pittaway et al. 2006 [17]        | 47 (19M:28W)          | 53 ± 9.8                       | ~4.77, ~4.80<br>-                                                                    | 5<br>4          | No                   | C       | OP Australia        | Partial           | Neutral           | 140                      |
| Pittaway et al. 2007 [18]        | 27 (10M:17W)          | 50.6 ± 10.5                    | -                                                                                    | 5<br>4          | No                   | C       | OP Australia        | Partial           | Neutral           | 140                      |
| Shams et al. 2008 [19]           | 30 T2D                | 50.2±3.8                       | 3.69 (0.44), 3.74 (0.34)<br>-                                                        | CHD Risk Equiv  | No                   | C       | OP Iran             | Partial           | Neutral           | 50                       |
| Winham et al. 2007 [20]          | 23 HC (10M:13W)       | 45.9 ± 10.6                    | ~4.76, ~4.70<br>3.47 (0.37), 3.50 (0.50)<br>-                                        | 1<br>1          | No                   | C       | OP United States    | Partial           | Neutral           | ~50                      |
| Winham et al. 2007 [21]          | 16 Mildly IR (7M:9W)  | 43 ± 12                        | ~4.01, ~4.09<br>3.37 (0.62), B: 3.57 (0.83), P: 3.34 (0.72)<br>-                     | 2<br>1          | No                   | C       | OP United States    | Partial           | Neutral           | ~50                      |
| Zhang et al. 2010- IS [22]       | 36 IS (36M:0W)        | 53.8 ± 7.6                     | ~4.00, B: ~4.25, P: ~4.01<br>3.13 (0.62), 3.21 (0.52)<br>-                           | 4<br>-          | No                   | C       | IP/OP United States | Metab             | Neutral           | 250                      |
| Zhang et al. 2010- IR [22]       | 28 IR (28M:0W)        | 55.5 ± 8                       | ~3.65, ~3.78<br>3.34 (0.96), 3.32 (0.82)<br>-                                        | 4<br>-          | No                   | C       | IP/OP United States | Metab             | Neutral           | 250                      |
|                                  |                       |                                | ~4.25, ~4.17                                                                         | -               |                      |         |                     |                   |                   |                          |
