# Supplementary material
Source: PubMed Central journal article supplement (PMC4016088)
Supplement: supp_131727_pulse-siev-3-at.pdf [file supp_131727_pulse-siev-3-at.pdf]

**Appendix 3: Assessment of study quality using the Heyland Methodological Quality Score<sup>23\*</sup>**

| Study (reference)             | Methodst            |                |                | Sample‡         |                     |                 | Intervention§  |                        |                  | Total score (n/13) |
|-------------------------------|---------------------|----------------|----------------|-----------------|---------------------|-----------------|----------------|------------------------|------------------|--------------------|
|                               | Randomization (n/2) | Blinding (n/1) | Analysis (n/2) | Selection (n/1) | Compatibility (n/1) | Follow-up (n/1) | Protocol (n/1) | Co-interventions (n/2) | Crossovers (n/2) |                    |
| Abete et al. 2009 (1)         | 1                   | 0              | 2              | 1               | 1                   | 1               | 0              | 1                      | 0                | 7                  |
| Abeysekara et al. 2012 (2)    | 2                   | 0              | 0              | 1               | 1                   | 0               | 1              | 1                      | 0                | 6                  |
| Anderson et al. 1984 (3)      | 1                   | 0              | 2              | 0               | 1                   | 1               | 1              | 2                      | 0                | 8                  |
| Anderson et al. 1990 (4)      | 1                   | 0              | 0              | 1               | 1                   | 0               | 1              | 2                      | 0                | 6                  |
| Belski et al. 2011 (5)        | 2                   | 1              | 0              | 1               | 1                   | 0               | 1              | 2                      | 0                | 8                  |
| Cobiac et al. 1990 (6)        | 1                   | 0              | 2              | 0               | 1                   | 1               | 1              | 2                      | 0                | 8                  |
| Duane et al. 1997 (7)         | 1                   | 0              | 2              | 0               | 1                   | 1               | 1              | 2                      | 0                | 8                  |
| Finley et al. 2007 (8)        | 1                   | 0              | 0              | 1               | 1                   | 0               | 1              | 2                      | 0                | 6                  |
| Gormley et al. 1979 (9)       | 1                   | 0              | 0              | 0               | 1                   | 0               | 0              | 1                      | 0                | 3                  |
| Gravel et al. 2010 (10)       | 2                   | 0              | 0              | 1               | 1                   | 0               | 0              | 2                      | 0                | 6                  |
| Hermsdorff et al. 2011 (11)   | 1                   | 0              | 2              | 0               | 1                   | 1               | 1              | 2                      | 0                | 8                  |
| Hodgeson et al. 2010 (12)     | 2                   | 0              | 0              | 1               | 1                   | 0               | 1              | 2                      | 0                | 7                  |
| Jenkins et al. 2012 (13)      | 1                   | 0              | 2              | 1               | 1                   | 0               | 1              | 2                      | 0                | 8                  |
| Jimenez-Cruz et al. 2004 (14) | 1                   | 0              | 2              | 1               | 1                   | 1               | 1              | 2                      | 0                | 9                  |
| Mackay et al. 1992 (15)       | 1                   | 0              | 0              | 0               | 1                   | 0               | 1              | 2                      | 0                | 5                  |
| Marinangeli et al. 2011 (16)  | 1                   | 0              | 0              | 1               | 1                   | 0               | 1              | 2                      | 0                | 6                  |
| Pittaway et al. 2006 (17)     | 1                   | 0              | 0              | 0               | 1                   | 0               | 1              | 2                      | 0                | 5                  |
| Pittaway et al. 2007 (18)     | 1                   | 0              | 0              | 0               | 1                   | 0               | 1              | 2                      | 0                | 5                  |
| Shams et al. 2008 (19)        | 1                   | 0              | 2              | 0               | 1                   | 1               | 0              | 2                      | 0                | 7                  |
| Winham et al. 2007 (20)       | 2                   | 0              | 0              | 1               | 1                   | 0               | 1              | 2                      | 0                | 7                  |
| Winham et al. 2007- COM (21)  | 1                   | 0              | 0              | 1               | 1                   | 0               | 1              | 2                      | 0                | 6                  |
| Zhang et al. 2010 (22)        | 1                   | 0              | 0              | 0               | 1                   | 0               | 1              | 2                      | 0                | 5                  |

\*The Heyland Methodological Quality Score<sup>23</sup> assigns a score of 0 or 1 or 0 to 2 over nine categories of quality related to study design, sampling procedures and interventions, for a total of 13 points. Trials given a score of 8 or higher were considered to be of high quality.

†Randomization = 2 points if randomized with the methods described, 1 point if randomized without the methods described or 0 points if neither randomized nor with the methods described. Blinding = 1 point if double-blind or 0 points if single-blinded or not blinded. Analysis = 2 points if intention-to-treat or no drop-outs, or 0 points if per-protocol with drop-outs.

‡Sample selection = 1 point if consecutive eligible or 0 points if preselected or indeterminate. Sample comparability = 1 point if comparable or 0 points if not comparable at baseline. Follow-up = 1 point if 100% or 0 points if < 100%.

§Intervention protocol = 1 point if reproducibly described or 0 points if poorly described. Co-interventions = 2 points if described and equal, 1 point if described but unequal or indeterminate, or 0 points if not described. Crossovers (where participants were switched from control to experimental intervention) = 2 points if ≥ 10%, 1 point if < 10% or 0 points if not described.

**References**

1. Abete I, Parra D, Martinez JA. Legume-, fish-, or high-protein-based hypocaloric diets: effects on weight loss and mitochondrial oxidation in obese men. *J Med Food* 2009;12:100-8.
2. Abeysekara S, Chilibeck PD, Vatanparast H, et al. A pulse-based diet is effective for reducing total and LDL-cholesterol in older adults. *Br J Nutr* 2012;108(Suppl 1):S103-10.
3. Anderson JW, Story L, Sieling B, et al. Hypocholesterolemic effects of oat-bran or bean intake for hypercholesterolemic men. *Am J Clin Nutr* 1984;40:1146-55.
4. Anderson JW, Gustafson NJ, Spencer DB, et al. Serum lipid response of hypercholesterolemic men to single and divided doses of canned beans. *Am J Clin Nutr* 1990;51:1013-9.
5. Belski R, Mori TA, Puddey IB, et al. Effects of lupin-enriched foods on body composition and cardiovascular disease risk factors: a 12-month randomized controlled weight loss trial. *Int J Obes (Lond)* 2011;35:810-9.
6. Cobiac L, McArthur R, Nestel PJ. Can eating baked beans lower plasma cholesterol? *Eur J Clin Nutr* 1990;44:819-22.
7. Duane WC. Effects of legume consumption on serum cholesterol, biliary lipids, and sterol metabolism in humans. *J Lipid Res* 1997;38:1120-8.
8. Finley JW, Burrell JB, Reeves PG. Pinto bean consumption changes SCFA profiles in fecal fermentations, bacterial populations of the lower bowel, and lipid profiles in blood of humans. *J Nutr* 2007;137:2391-8.
9. Gormley TR, Kevany J, O'Donnell B, et al. Effect of peas on serum cholesterol levels in humans. *Int J Food Sci Technol* 1979;3:101-9.
