# Supplementary material
Source: PubMed Central journal article supplement (PMC4016088)
Supplement: supp_131727_pulse-siev-9-at.pdf [file supp_131727_pulse-siev-9-at.pdf]

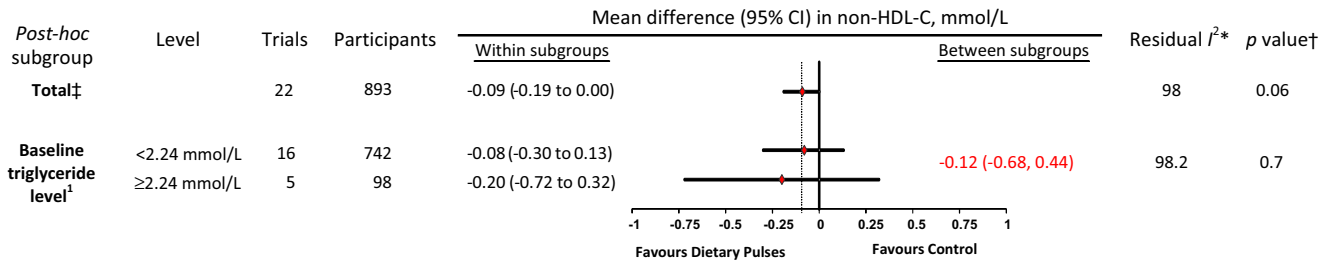

**Appendix 9: Post-hoc subgroup analysis for dichotomous baseline triglyceride levels on the effect of isocaloric exchange of dietary pulse intake for other dietary comparators on non-high-density lipoprotein cholesterol (non-HDL-C) in all participants.** The cutoff for triglyceride levels is based on the National Cholesterol Education Program – Adult Treatment Plan III guidelines for hypertriglyceridemia.<sup>1</sup> Point estimates for each subgroup level (diamonds) are the pooled effect estimates. The dashed line represents the pooled effect estimate for the overall (total) analysis.

\*Residual  $I^2$  value reflects the level of inter-study heterogeneity that remains unexplained by the subgroup.

† $p$  values reflect the level of significance for each of the main subgroup effects assessed by meta-regression analyses at a significance level of  $p < 0.05$ .

‡Total represents the pooled effect estimate for the overall primary analysis.

#### Reference

1. National Cholesterol Education Program Expert Panel on Detection E. Third report of the National Cholesterol Education Program (NCEP) Expert Panel on Detection, Evaluation, and Treatment of High Blood Cholesterol in Adults (Adult Treatment Panel III) final report. *Circulation* 2002;106:3143-421.
