# Supplementary material
Source: PubMed Central journal article supplement (PMC4016088)
Supplement: supp_131727_pulse-siev-10-at.pdf [file supp_131727_pulse-siev-10-at.pdf]

**A**

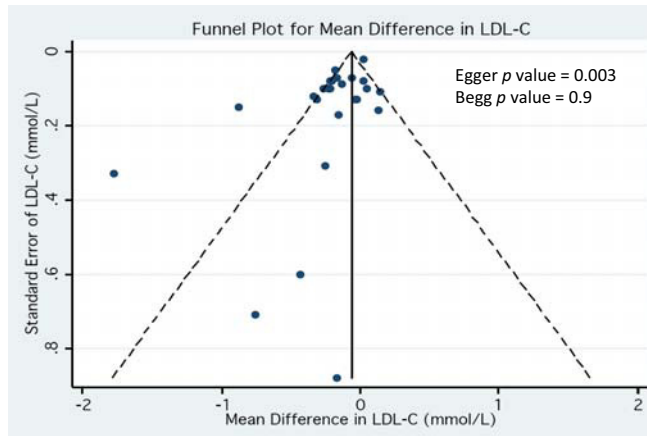

**B**

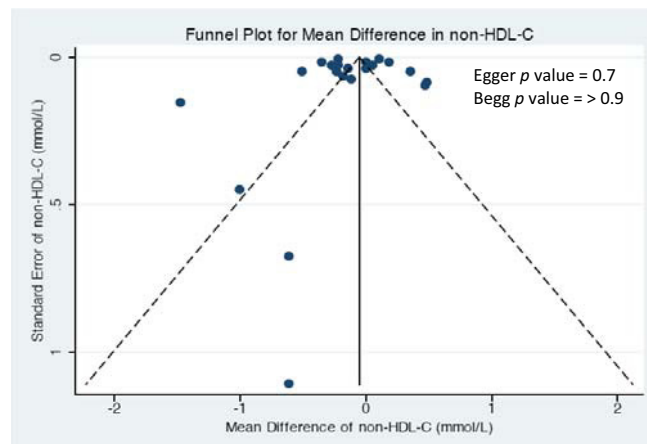

**Appendix 10: Funnel plots investigating publication bias.**

Funnel plots investigating publication bias and small-study effects in clinical trials with isocaloric exchange of dietary pulse intake for other dietary comparators on (A) low-density lipoprotein cholesterol (LDL-C) and (B) non-high-density lipoprotein cholesterol (non-HDL-C) in all participants. The solid line represents the pooled effect estimate expressed as the weighted mean difference for each analysis. Dashed lines represent pseudo-95% confidence limits.
